# Supplementary material for: The coupled Southern Ocean–Sea ice–Ice shelf Model (SOSIM v1.0): configuration and evaluation
Source: Copernicus journal article supplement (doi:10.5194/egusphere-2025-6487), 2026-01-26
Supplement: Supplementary file 1 [file egusphere-2025-6487-supplement.pdf]

## *Supplement of*

# **The coupled Southern Ocean–Sea ice–Ice shelf Model (SOSIM v1.0): configuration and evaluation**

Chengyan Liu<sup>1\*</sup>, Zhaomin Wang<sup>1\*</sup>, Dake Chen<sup>1</sup>, Xianxian Han<sup>1</sup>, Hengling Leng<sup>1</sup>, Xi Liang<sup>2</sup>, Liangjun  
5 Yan<sup>3</sup>, Xiang Li<sup>1</sup>, Craig Stevens<sup>4</sup>, Andrew McC. Hogg<sup>5</sup>, Kazuya Kusahara<sup>6</sup>, Kaihe Yamazaki<sup>7</sup>, Kay I.  
Ohshima<sup>8</sup>, Meng Zhou<sup>9</sup>, Xiao Cheng<sup>10</sup>, Dongxiao Wang<sup>3</sup>, Changming Dong<sup>11</sup>, Jiping Liu<sup>12</sup>, Qinghua  
Yang<sup>12</sup>, Xichen Li<sup>13</sup>, Ruibo Lei<sup>14</sup>, Minghu Ding<sup>15</sup>, Zhaoru Zhang<sup>9</sup>, Dujuan Kang<sup>9</sup>, Di Qi<sup>16</sup>, Tongya Liu<sup>17</sup>,  
Jihai Dong<sup>11</sup>, Lu An<sup>18</sup>, Ru Chen<sup>19</sup>, Tong Zhang<sup>20</sup>, Xiaoming Hu<sup>12</sup>, Bo Han<sup>12</sup>, Haibo Bi<sup>21</sup>, Qi Shu<sup>22</sup>,  
Longjiang Mu<sup>23</sup>, Shiming Xu<sup>24</sup>, Hu Yang<sup>1</sup>, Hailong Liu<sup>25</sup>, Tingfeng Dou<sup>26</sup>, Zhixuan Feng<sup>27</sup>, Lei Zheng<sup>10</sup>,  
10 Xueyuan Tang<sup>15</sup>, Guitao Shi<sup>28</sup>, Yongqing Cai<sup>15</sup>, Bingrui Li<sup>15</sup>, Yang Wu<sup>29</sup>, Xia Lin<sup>11</sup>, Wenjin Sun<sup>11</sup>, Yu  
Liu<sup>30</sup>, Kai Yu<sup>31</sup>, Yu Zhang<sup>32</sup>, Weizeng Shao<sup>32</sup>, Xiaoyu Wang<sup>33</sup>, Shaojun Zheng<sup>34</sup>, Chengyi Yuan<sup>35</sup>,  
Chunxia Zhou<sup>36</sup>, Jian Liu<sup>1</sup>, Yang Liu<sup>12</sup>, Yue Xia<sup>12</sup>, Xiaoyu Pan<sup>12</sup>, Jiabao Zeng<sup>12</sup>, Kechen Liu<sup>37</sup>, Jiahao  
Fan<sup>12</sup>, Chen Cheng<sup>1</sup>, and Qi Li<sup>1</sup>

<sup>1</sup>Southern Marine Science and Engineering Guangdong Laboratory (Zhuhai), Zhuhai, 519080, China

15 <sup>2</sup>Key Laboratory of Marine Hazards Forecasting, National Marine Environmental Forecasting Center, Ministry of Natural  
Resources, Beijing, 100081, China

<sup>3</sup>School of Marine Science, Sun Yat-sen University, Zhuhai, 519082, China

<sup>4</sup>Earth Sciences New Zealand, Wellington, 6021, New Zealand

<sup>5</sup>Research School of Earth Sciences and ARC Centre of Excellence for Climate System Science, Australian National  
20 University, Canberra, ACT 2600, Australia

<sup>6</sup>Japan Agency for Marine–Earth Science and Technology, Yokohama, 237-0061, Japan

<sup>7</sup>Institute of Marine and Antarctic Studies, University of Tasmania, Hobart, TAS 7001, Australia

<sup>8</sup>Institute of Low Temperature Science, Hokkaido University, Sapporo, 060-0819, Japan

<sup>9</sup>Key Laboratory of Polar Ecosystem and Climate Change, Ministry of Education and School of Oceanography, Shanghai  
25 Jiao Tong University, Shanghai, 200240, China

<sup>10</sup>School of Geospatial Engineering and Science, Sun Yat-sen University, 519082, Zhuhai, China

<sup>11</sup>School of Marine Sciences, Nanjing University of Information Science and Technology, Nanjing, 210044, China

<sup>12</sup>School of Atmospheric Sciences, Sun Yat-sen University, Zhuhai, 519082, China

<sup>13</sup>Institute of Atmospheric Physics, Chinese Academy of Sciences, Beijing, 100029, China

30 <sup>14</sup>Polar Research Institute of China, Shanghai, 200136, China

<sup>15</sup>State Key Laboratory of Severe Weather, Chinese Academy of Meteorological Sciences, Beijing, 100081, China

<sup>16</sup>Polar and Marine Research Institute, Jimei University, Xiamen, 361021, China

<sup>17</sup>State Key Laboratory of Satellite Ocean Environment Dynamics, Second Institute of Oceanography, Ministry of Natural  
Resources, Hangzhou, 310012, China

35 <sup>18</sup>College of Surveying and Geo-Informatics, Tongji University, Shanghai, 200092, China

<sup>19</sup>School of Marine Science and Technology, Tianjin University, Tianjin, 300072, China

<sup>20</sup>State Key Laboratory of Earth Surface Processes and Disaster Risk Reduction, Faculty of Geographical Science, Beijing  
Normal University, Beijing 100875, China

<sup>21</sup>Key Laboratory of Marine Geology and Environment, Institute of Oceanology, Chinese Academy of Sciences, Qingdao,  
40 266071, China

<sup>22</sup>First Institute of Oceanography, and Key Laboratory of Marine Science and Numerical Modeling, Ministry of Natural  
Resources, Qingdao, 266061, China

<sup>23</sup>Laoshan Laboratory, Qingdao, 266100, China.

- 45 <sup>24</sup>Ministry of Education Key Laboratory for Earth System Modeling, Department of Earth System Science, Tsinghua University, Beijing, 100084, China
- <sup>25</sup>Yunnan Key Laboratory of Meteorological Disasters and Climate Resources in the Greater Mekong Subregion, Yunnan University, Kunming, 650500, China
- <sup>26</sup>College of Resources and Environment, University of Chinese Academy of Sciences, Beijing, 100049, China
- <sup>27</sup>State Key Laboratory of Estuarine and Coastal Research, East China Normal University, Shanghai, 200241, China
- 50 <sup>28</sup>School of Geographic Sciences and State Key Laboratory of Estuarine and Coastal Research, East China Normal University, Shanghai, 200241, China
- <sup>29</sup>School of Information Engineering, Nanjing Xiaozhuang University, Nanjing, 211171, China
- <sup>30</sup>Marine Science and Technology College, Zhejiang Ocean University, Zhoushan, 316000, China
- <sup>31</sup>Key Laboratory of Marine Hazards Forecasting, Ministry of Natural Resources, Hohai University, Nanjing, 210098, China
- 55 <sup>32</sup>College of Oceanography and Ecological Science, Shanghai Ocean University, Shanghai, 201306, China
- <sup>33</sup>Frontier Science Center for Deep Ocean Multispheres and Earth System, Ocean University of China, Qingdao, 266100, China
- <sup>34</sup>Key Laboratory of Climate, Resources and Environment in Continental Shelf Sea and Deep Sea of Department of Education of Guangdong Province, Guangdong Ocean University, Zhanjiang, 524088, China
- 60 <sup>35</sup>Department of Marine Technology, College of Marine and Environmental Sciences, Tianjin University of Science and Technology, Tianjin, 300457, China
- <sup>36</sup>Chinese Antarctic Centre of Surveying and Mapping, Wuhan University, Wuhan, 430079, China
- <sup>37</sup>College of Meteorology and Oceanography, National University of Defense Technology, Changsha, 410073, China
- Correspondence to:* Chengyan Liu (liuchengyan@sml-zhuhai.cn); Zhaomin Wang (wangzhaomin@sml-zhuhai.cn)

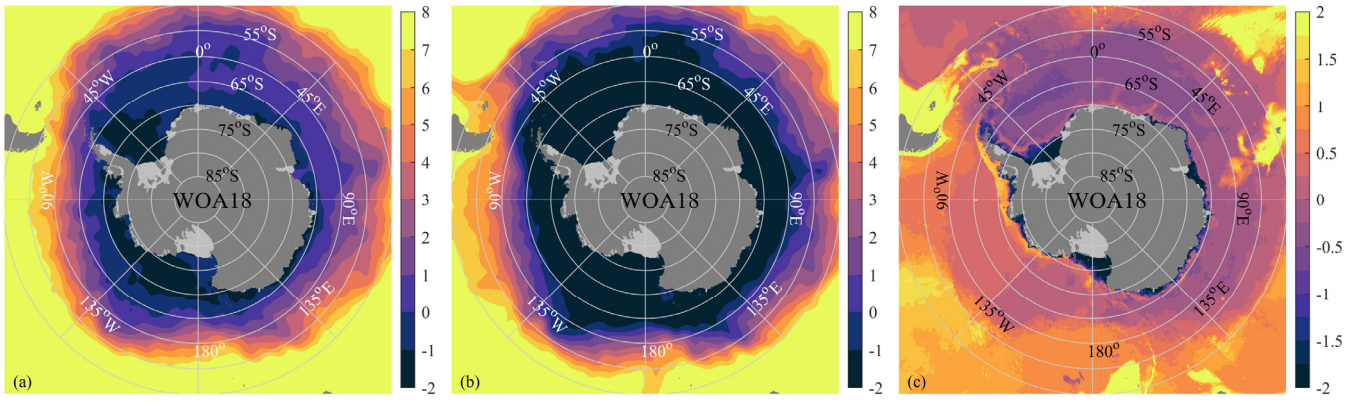

**Fig. S1.** The horizontal distribution of  $\theta$  ( $^{\circ}\text{C}$ ). **(a)** Climatological SST in summer from WOA18. **(b)** As in **(a)**, but for SST in winter. **(c)** As in **(a)**, but for the climatological annual mean  $\theta$  at the bottom layer.

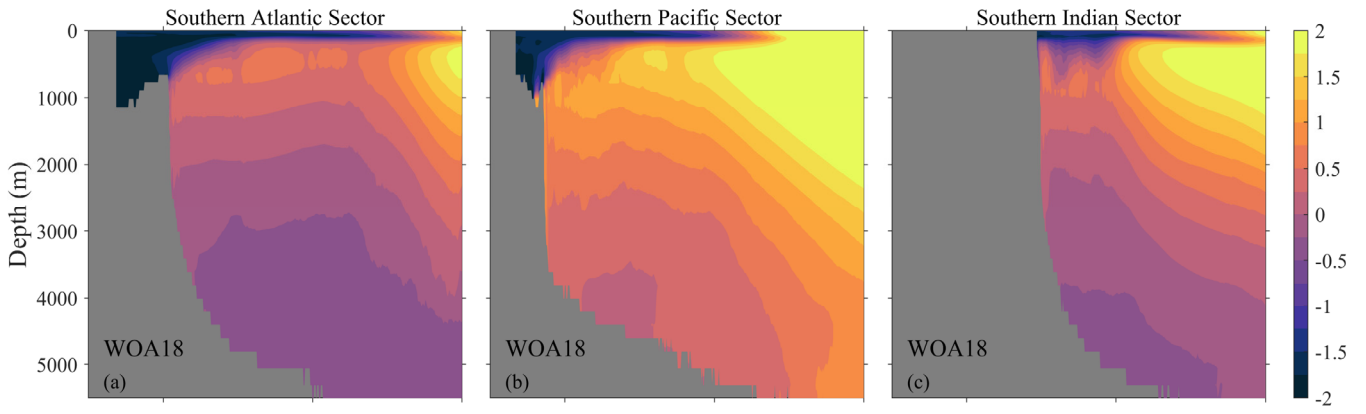

**Fig. S2.** The vertical distribution of zonally averaged  $\theta$  ( $^{\circ}\text{C}$ ). **(a)** Climatological annual mean of zonally averaged  $\theta$  in the Southern Atlantic sector from WOA18. The zonal average is calculated by omitting dry grids. **(b)** and **(c)** As in **(a)**, but for the Southern Pacific and Southern Indian sectors, respectively.

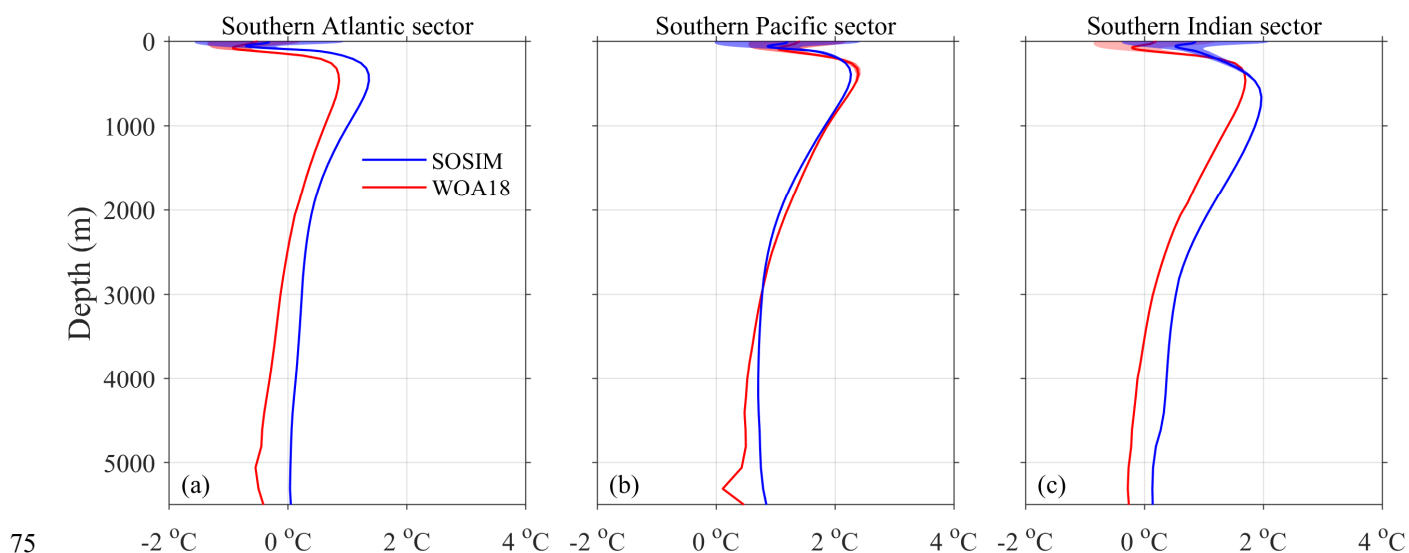

**Fig. S3.** The vertical profiles of horizontally area-averaged  $\theta$  ( $^{\circ}\text{C}$ ). **(a)** The horizontally area-averaged  $\theta$  within the Southern Atlantic sector (semi-transparent red region in Fig. 5a in the manuscript). Semi-transparent color shading denotes the STD of monthly climatology. **(b)** and **(c)** As in **(a)**, but for the Southern Pacific and Southern Indian sectors, respectively.

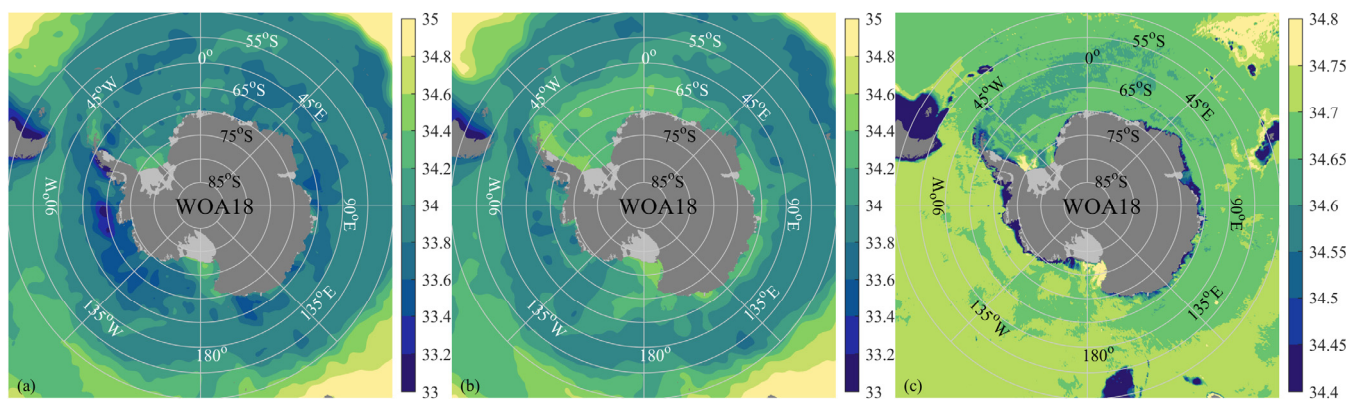

**Fig. S4.** As in Fig. S1, but for the horizontal distribution of  $S$  (psu).

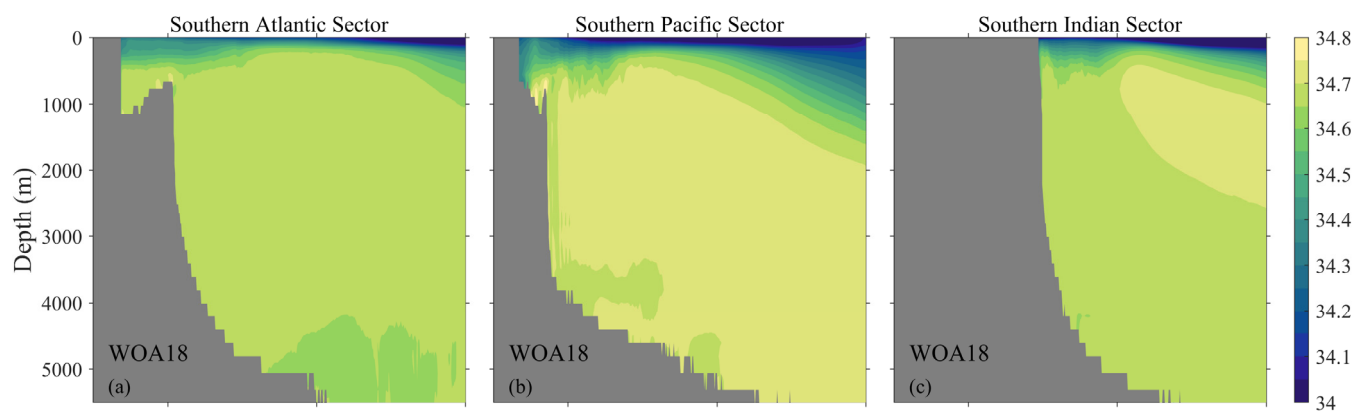

**Fig. S5.** As in Fig. S2, but for the vertical distribution of zonally averaged  $S$  (psu).

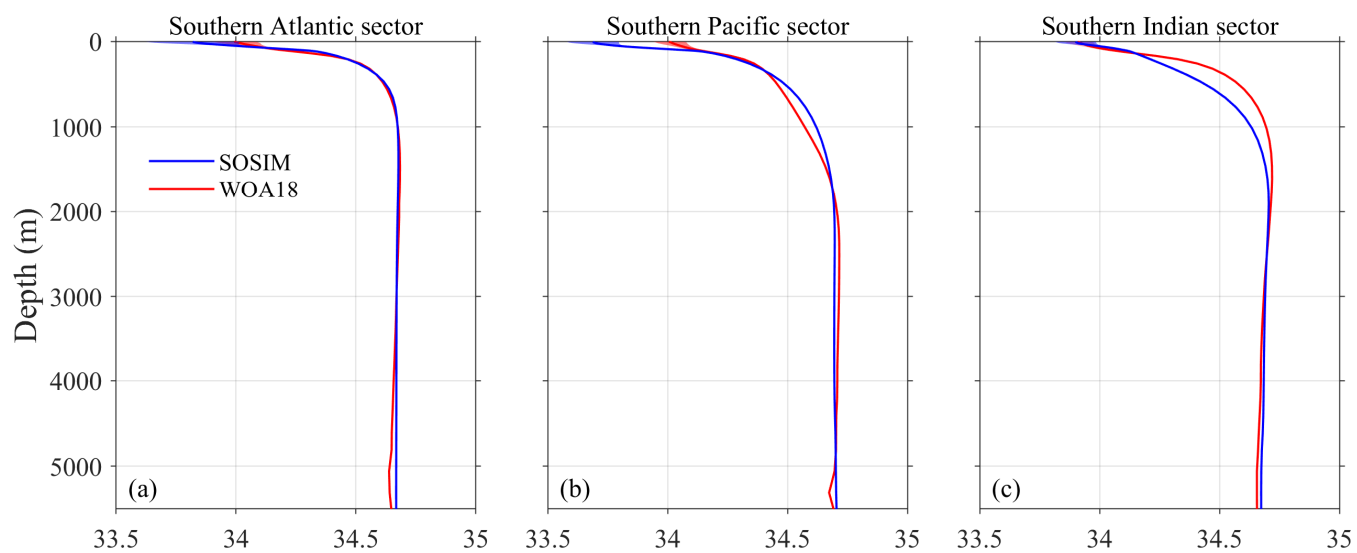

**Fig. S6.** As in Fig. S3, but for the horizontally area-averaged  $S$  (psu).



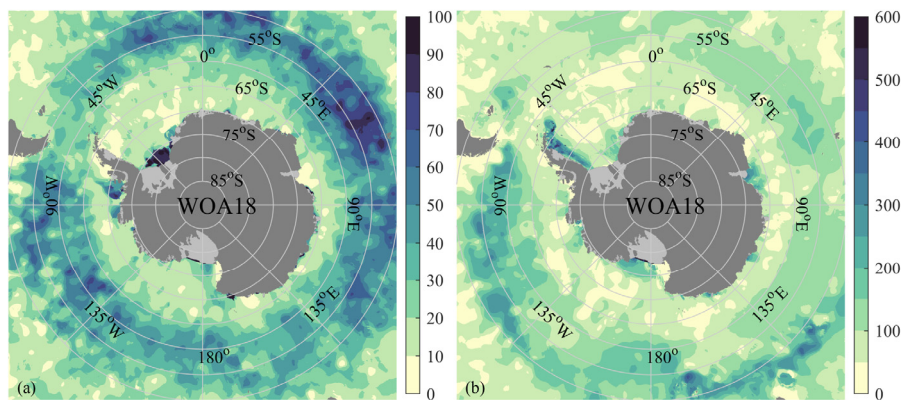

**Fig. S7.** The horizontal distribution of MLD (m). **(a)** The MLD of WOA18 in the austral summer. **(b)** As in **(a)**, but for the MLD in the austral winter.

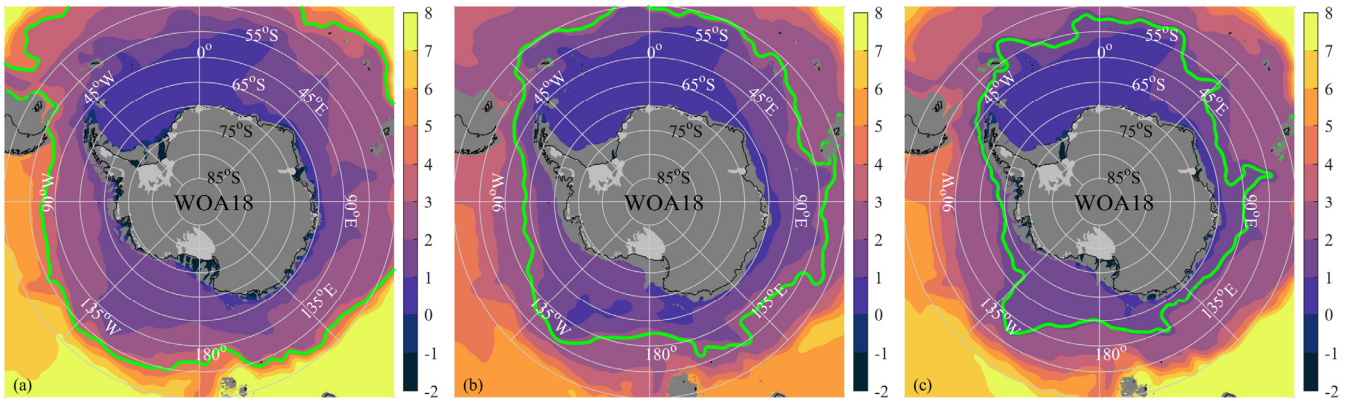

**Fig. S8.** The circumpolar distribution of the SAF, PF, and SACCF in WOA18, with  $\theta$  ( $^{\circ}\text{C}$ ) at corresponding depths in color.

95 (a) The SAF (the green line, 4  $^{\circ}\text{C}$  isotherm) and  $\theta$  ( $^{\circ}\text{C}$ ) at 400 m depth. (b) As in (a), but for the PF (2.2  $^{\circ}\text{C}$  isotherm) and  $\theta$  ( $^{\circ}\text{C}$ ) at 800 m depth. (c) As in (a), but for the SACCF (1.8  $^{\circ}\text{C}$  isotherm) and  $\theta$  ( $^{\circ}\text{C}$ ) at 500 m depth.

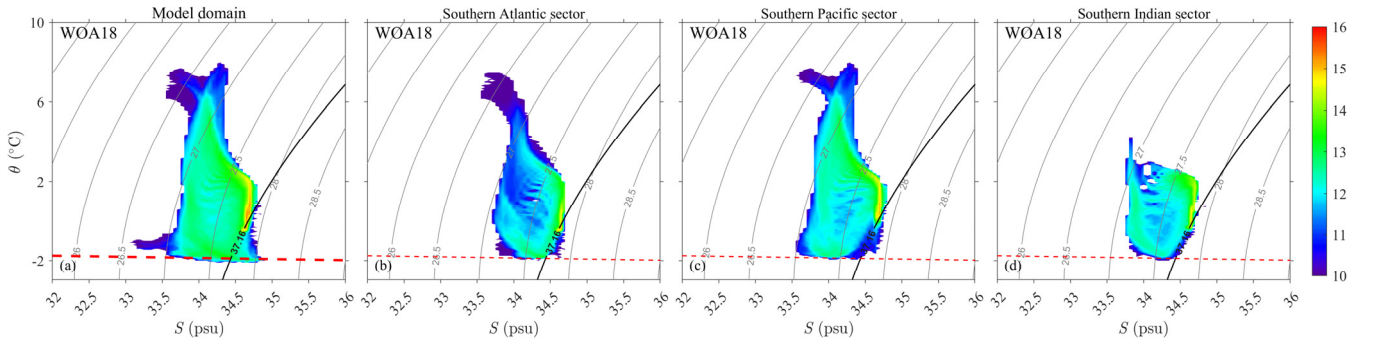

**Fig. S9.** (a) Climatological water mass volume ( $\log_{10}(V)$ ,  $\text{m}^3$ ) distribution in  $\theta$ - $S$  space (bins of  $0.05^{\circ}\text{C}$  by  $0.05 \text{ psu}$  size) in the inner model domain in WOA18, superimposed with potential density  $\sigma_0$  (grey lines) in contour intervals of  $0.5 \text{ kg m}^{-3}$ . The red dashed line denotes the surface freezing point of seawater. The black lines denote the  $\sigma_2$  contours of  $37.16 \text{ kg m}^{-3}$ , indicating the threshold between CDW and AABW. (b-d) As in (a), but for the Southern Atlantic sector, the Southern Pacific sector, and the Southern Indian sector, respectively.

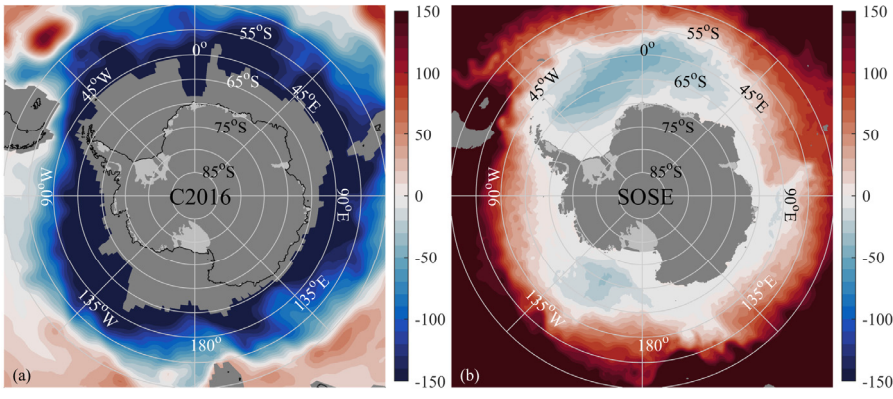

**Fig. S10.** The barotropic stream function. **(a)** The climatological  $\Psi$  (Sv) estimated from the C2016. The grey region over the open ocean indicates the absence of observational estimation. **(b)** As in **(a)**, but for SOSE. Negative cells denote cyclonic circulations.

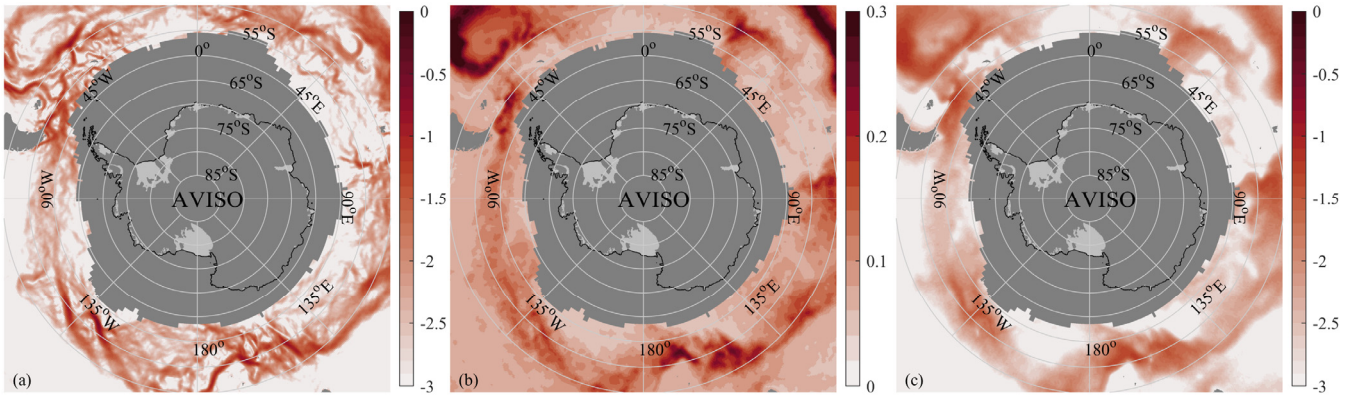

**Fig. S11.** The sea surface Kinetic Energy and the variability of  $\eta$ . **(a)** The  $\log_{10}(MKE_{surf})$  ( $\text{m}^2 \text{s}^{-2}$ ) in the AVISO. The grey region over the open ocean indicates the absence of year-round data in the AVISO. **(b)** and **(a)** As in **(a)**, but for the STD of  $\eta$  (m) and the  $\log_{10}(EKE_{surf})$  ( $\text{m}^2 \text{s}^{-2}$ ), respectively.

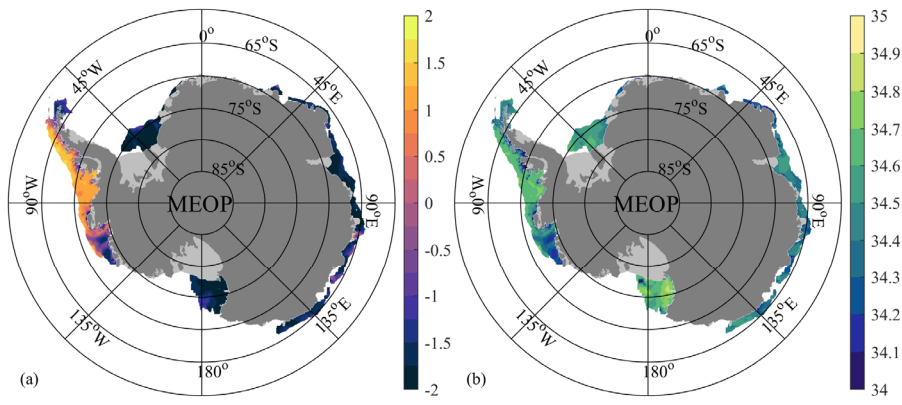

**Fig. S12.** The horizontal distribution of  $\theta$  (°C) and  $S$  (psu) over the continental shelf. **(a)** Climatological  $\theta$  at the bottom layer from the gridded MEOP. **(b)** As in **(a)**, but for bottom  $S$ .

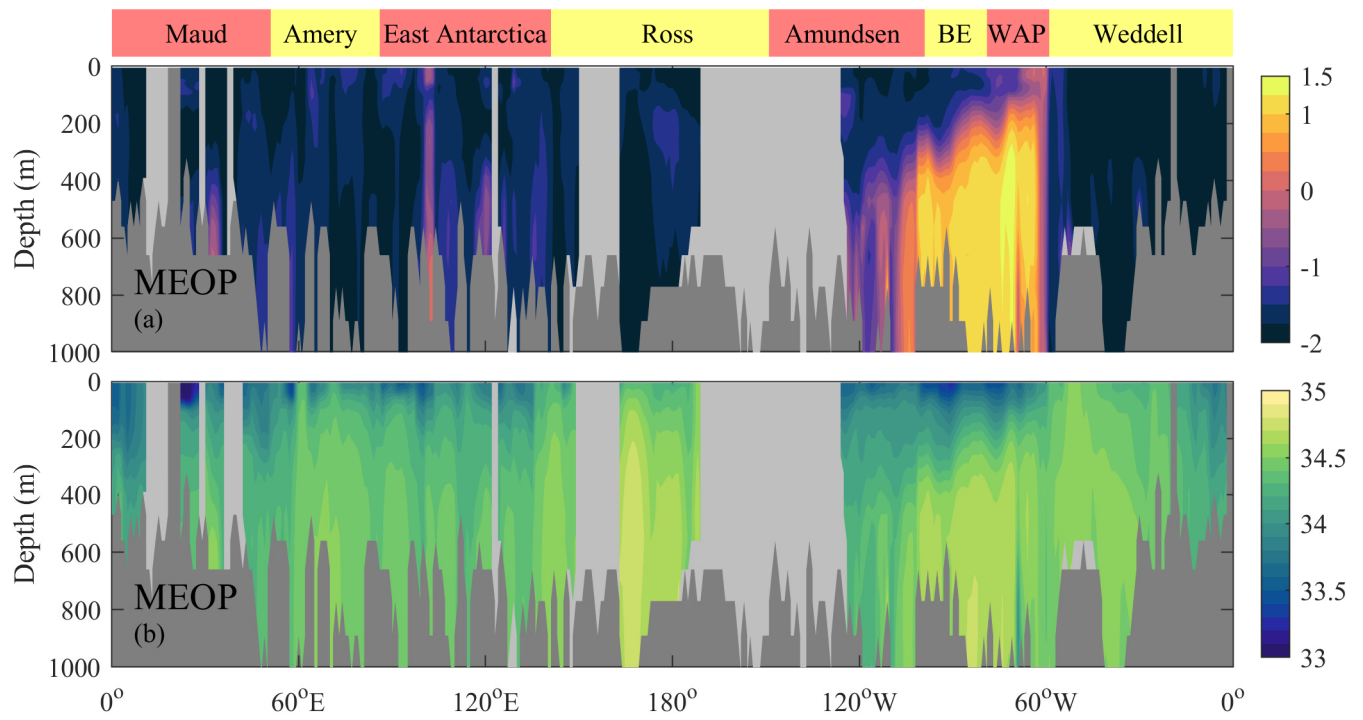

**Fig. S13.** The vertical structure of  $\theta$  (°C) and  $S$  (psu) over the continental shelf. **(a)** Meridionally averaged  $\theta$  over the continental shelf from the gridded MEOP. The light grey region indicates the absence of year-round data in the gridded MEOP. **(b)** As in **(a)**, but for  $S$ .

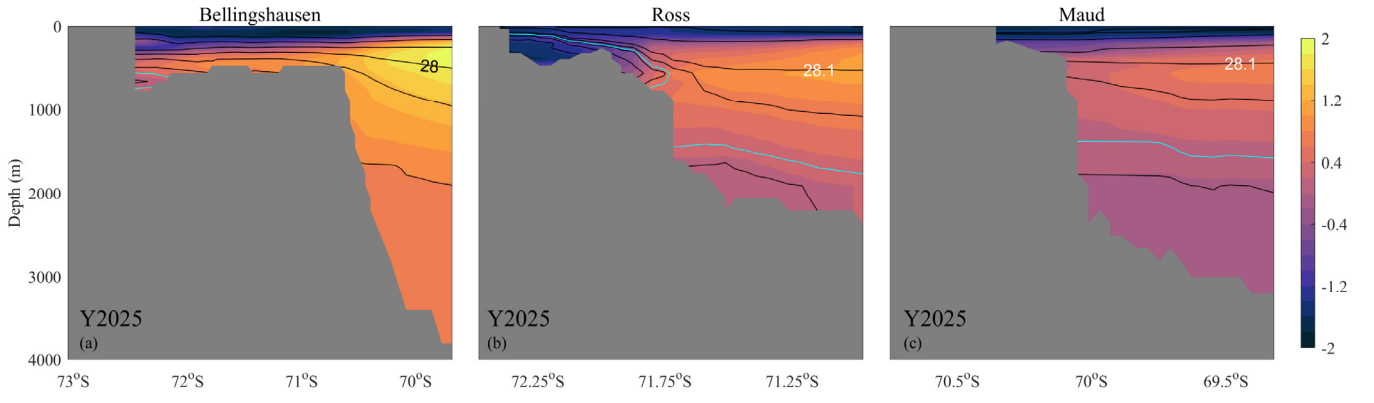

**Fig. S14.** The meridional structure of  $\theta$  ( $^{\circ}\text{C}$ ) along the selected transects (blue lines in Fig. 5b) perpendicular to the continental slope. **(a)** Climatological  $\theta$  along the selected transect in the Bellingshausen sector from Y2025. Black lines denote  $\sigma_0$  ( $\text{kg m}^{-3}$ ) in contour intervals of  $0.1 \text{ kg m}^{-3}$ . **(b)** and **(c)** As in **(a)**, but for the transects in the Ross and Maud sectors, respectively. The cyan lines denote the  $\gamma^n$  contour of  $28.27 \text{ kg m}^{-3}$ .



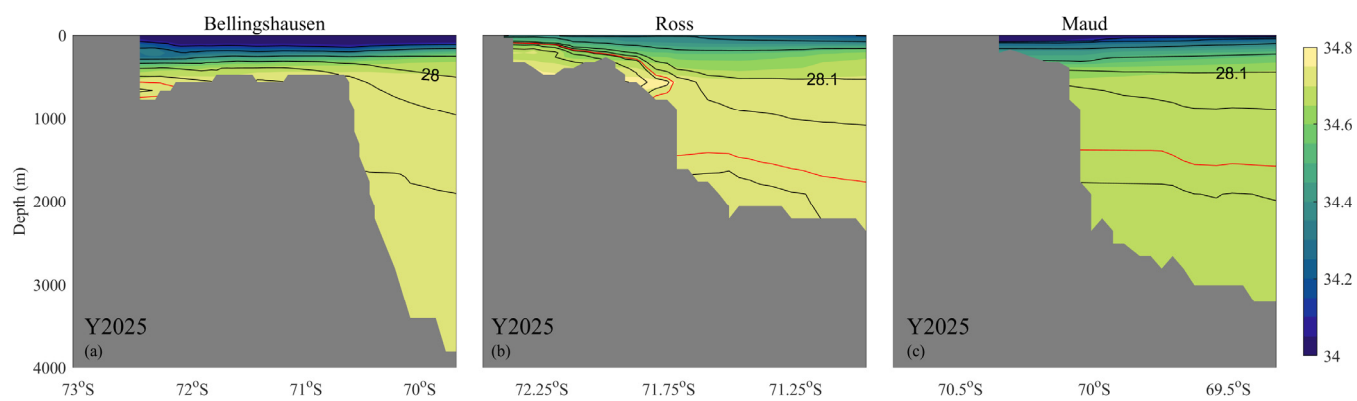

130 **Fig. S15.** As in Fig. S14, but for  $S$  (psu), with the red line denoting the  $\gamma^n$  contour of  $28.27 \text{ kg m}^{-3}$ .

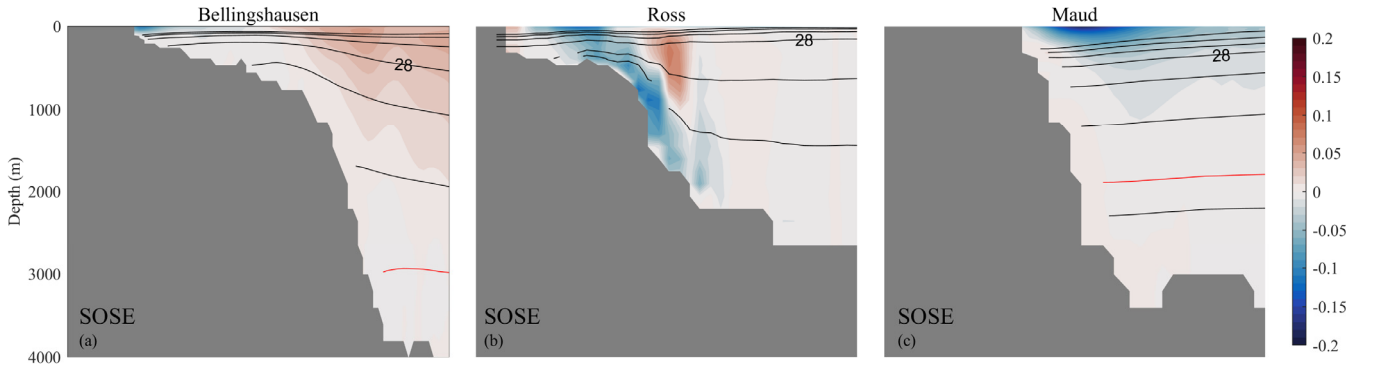

**Fig. S16.** The meridional structure of  $u_{\text{along}}$  ( $\text{m s}^{-1}$ ) along the selected transects (blue lines in Fig. 5b) perpendicular to the continental slope. **(a)** Climatological  $u_{\text{along}}$  along the selected transect in the Bellingshausen sector from the SOSE. Positive values indicate a current flowing to the right of the down-slope direction (i.e., a generally eastward-flowing ASC). Black lines denote  $\sigma_0$  ( $\text{kg m}^{-3}$ ) in contour intervals of  $0.1 \text{ kg m}^{-3}$ . The red line denotes the  $\gamma^n$  contour of  $28.27 \text{ kg m}^{-3}$ . **(b)** and **(c)** As in **(a)**, but for the transects in the Ross and Maud sectors, respectively.

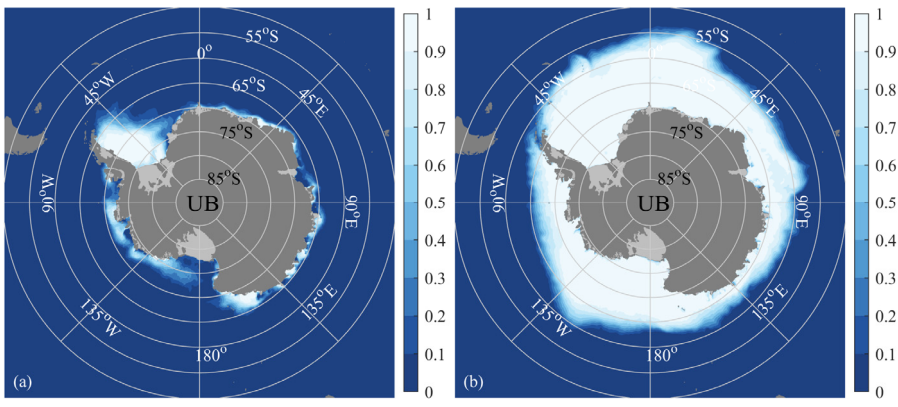

140 **Fig. S17.** The spatial pattern of SIC. **(a)** The satellite observed SIC in February from the UB. **(b)** As in **(a)**, but for September.

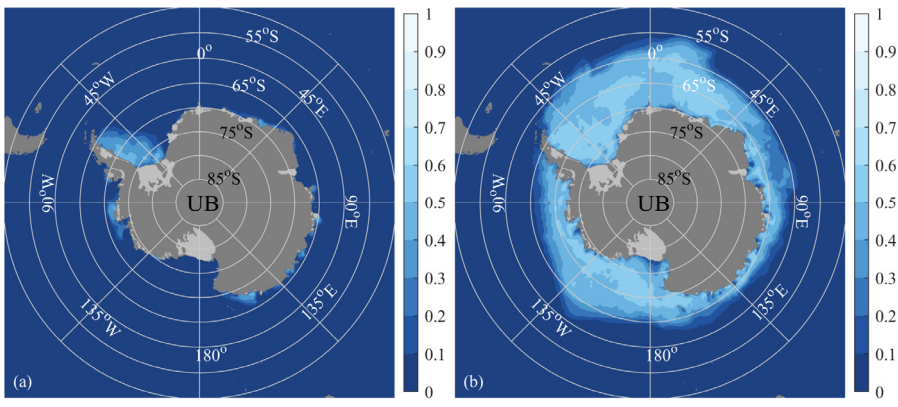

**Fig. S18.** As in Fig. S17, but for the SIT (m).

145

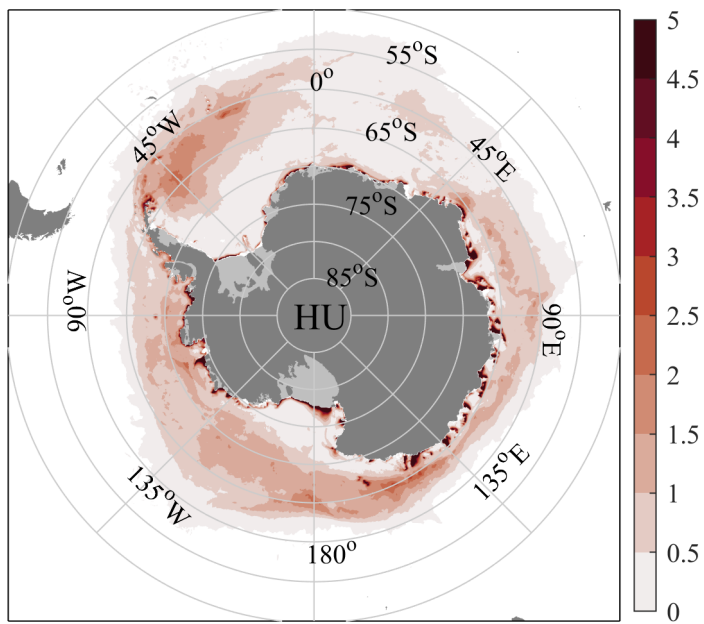

**Fig. S19.** The spatial pattern of estimated SIP ( $\text{m yr}^{-1}$ ) during the freezing period (March-October) based on the AMSR-E by the HU.

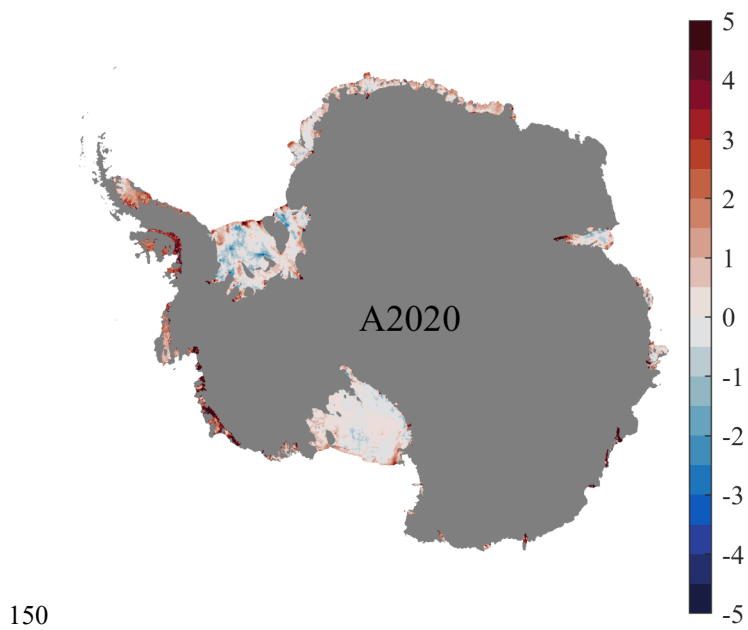

**Fig. S20.** The observed annual climatology of spatial pattern of  $SHI_{fw}$  ( $\text{m yr}^{-1}$ ) from A2020.
